# Supplementary material for: Unnatural lipids for simultaneous mRNA delivery and metabolic cell labeling
Source: Royal Society of Chemistry journal article supplement (doi:10.1039/d4bm00625a), 2024-01-01
Supplement: d4bm00625a1.pdf [file d4bm00625a1.pdf]

## Supporting Information for

### Unnatural Lipids for Simultaneous mRNA Delivery and Metabolic Cell Labeling

Yusheng Liu<sup>1</sup>, Jiadio Zhou<sup>1</sup>, Yueji Wang<sup>1</sup>, Dhyanesh Baskaran<sup>1</sup>, Hua Wang<sup>1,2,3,4,5,6,7\*</sup>

<sup>1</sup>Department of Materials Science and Engineering, University of Illinois at Urbana-Champaign, Urbana, IL 61801, USA. <sup>2</sup>Cancer Center at Illinois (CCIL), Urbana, IL 61801, USA. <sup>3</sup>Department of Bioengineering, University of Illinois at Urbana-Champaign, Urbana, IL 61801, USA. <sup>4</sup>Carle College of Medicine, University of Illinois at Urbana-Champaign, Urbana, IL 61801, USA. <sup>5</sup>Beckman Institute for Advanced Science and Technology, University of Illinois at Urbana-Champaign, Urbana, IL 61801, USA. <sup>6</sup>Materials Research Laboratory, University of Illinois at Urbana-Champaign, Urbana, IL 61801, USA. <sup>7</sup>Institute for Genomic Biology, University of Illinois at Urbana-Champaign, Urbana, IL 61801, USA.

\*correspondence should be addressed to [huawang3@illinois.edu](mailto:huawang3@illinois.edu)

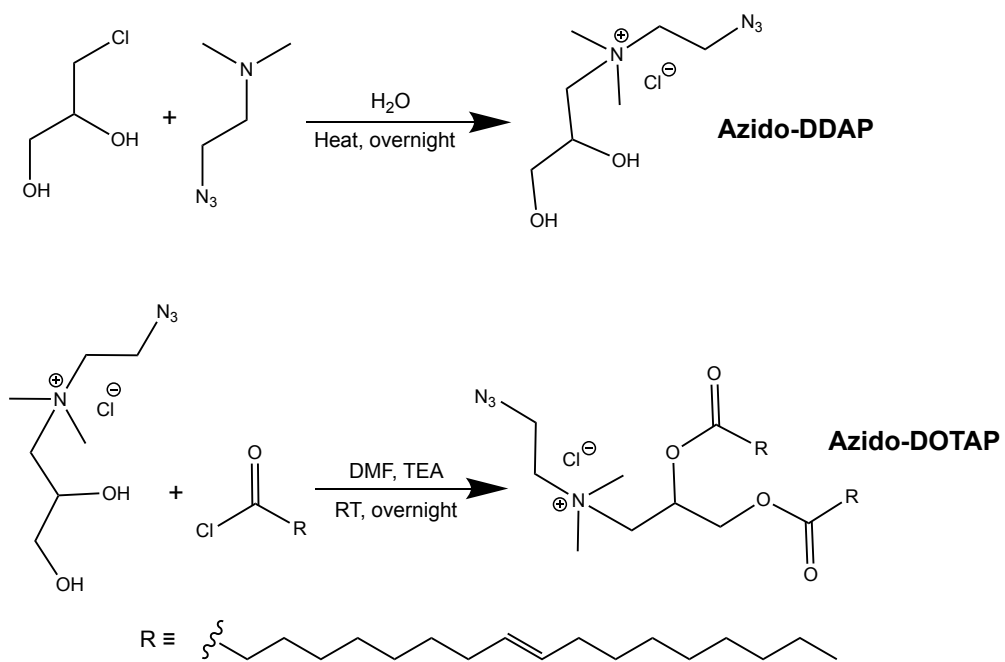

**Figure S1.** Synthetic route of azido-DDAP and azido-DOTAP.

**a**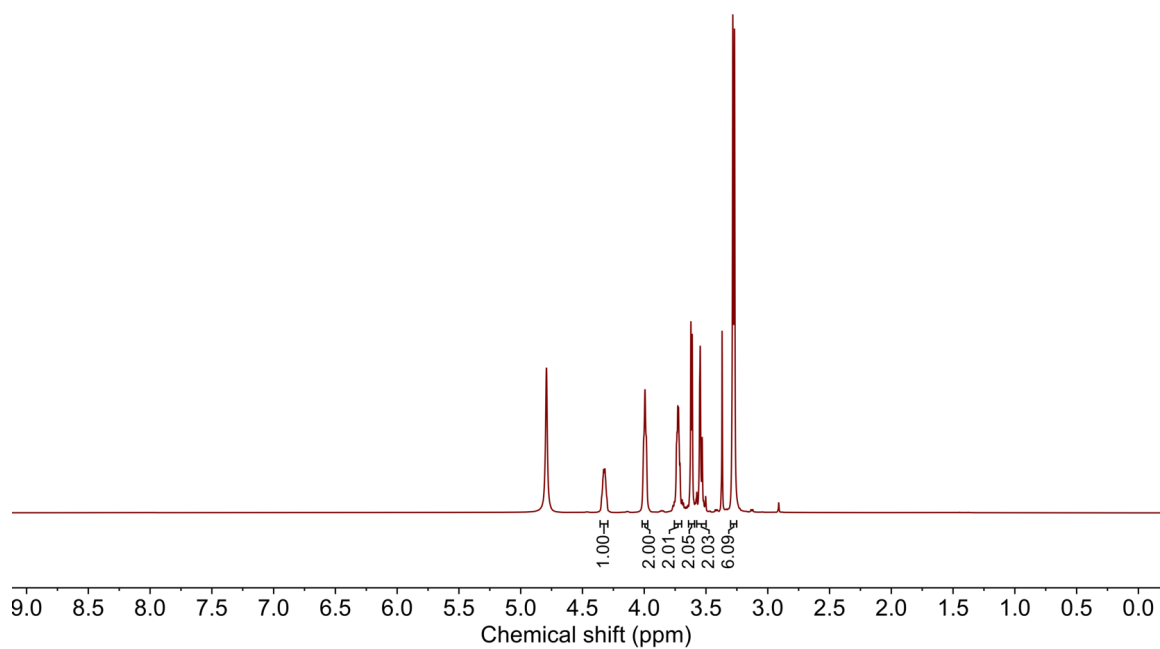**b**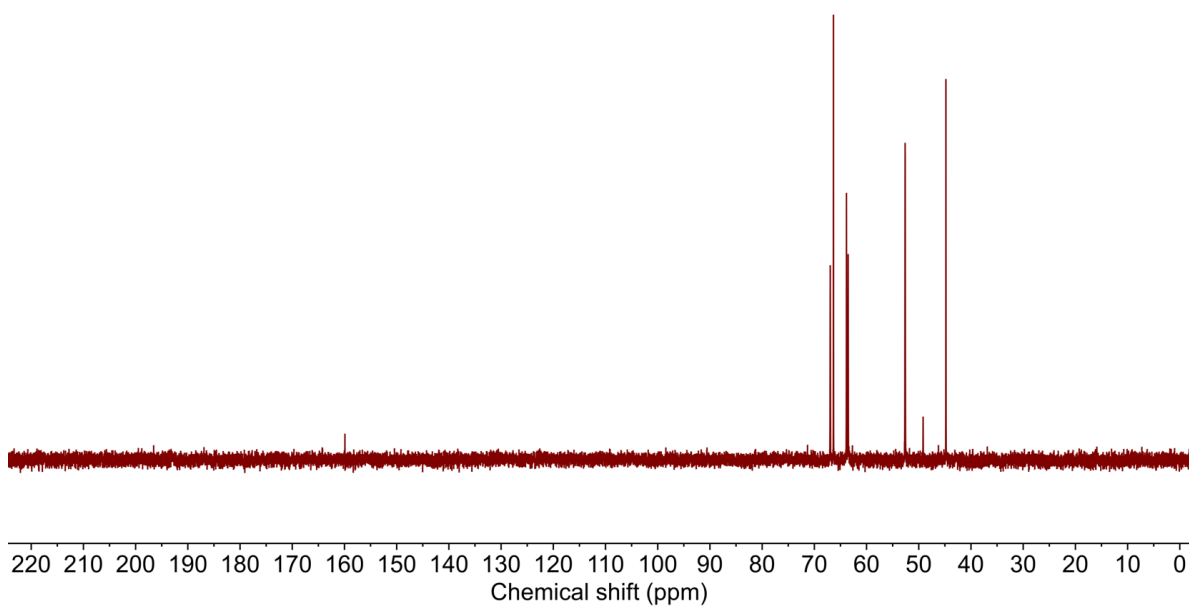

**Figure S2.** (a)  $^1\text{H}$  NMR spectrum and (b)  $^{13}\text{C}$  NMR spectrum of azido-DDAP in  $\text{D}_2\text{O}$ .

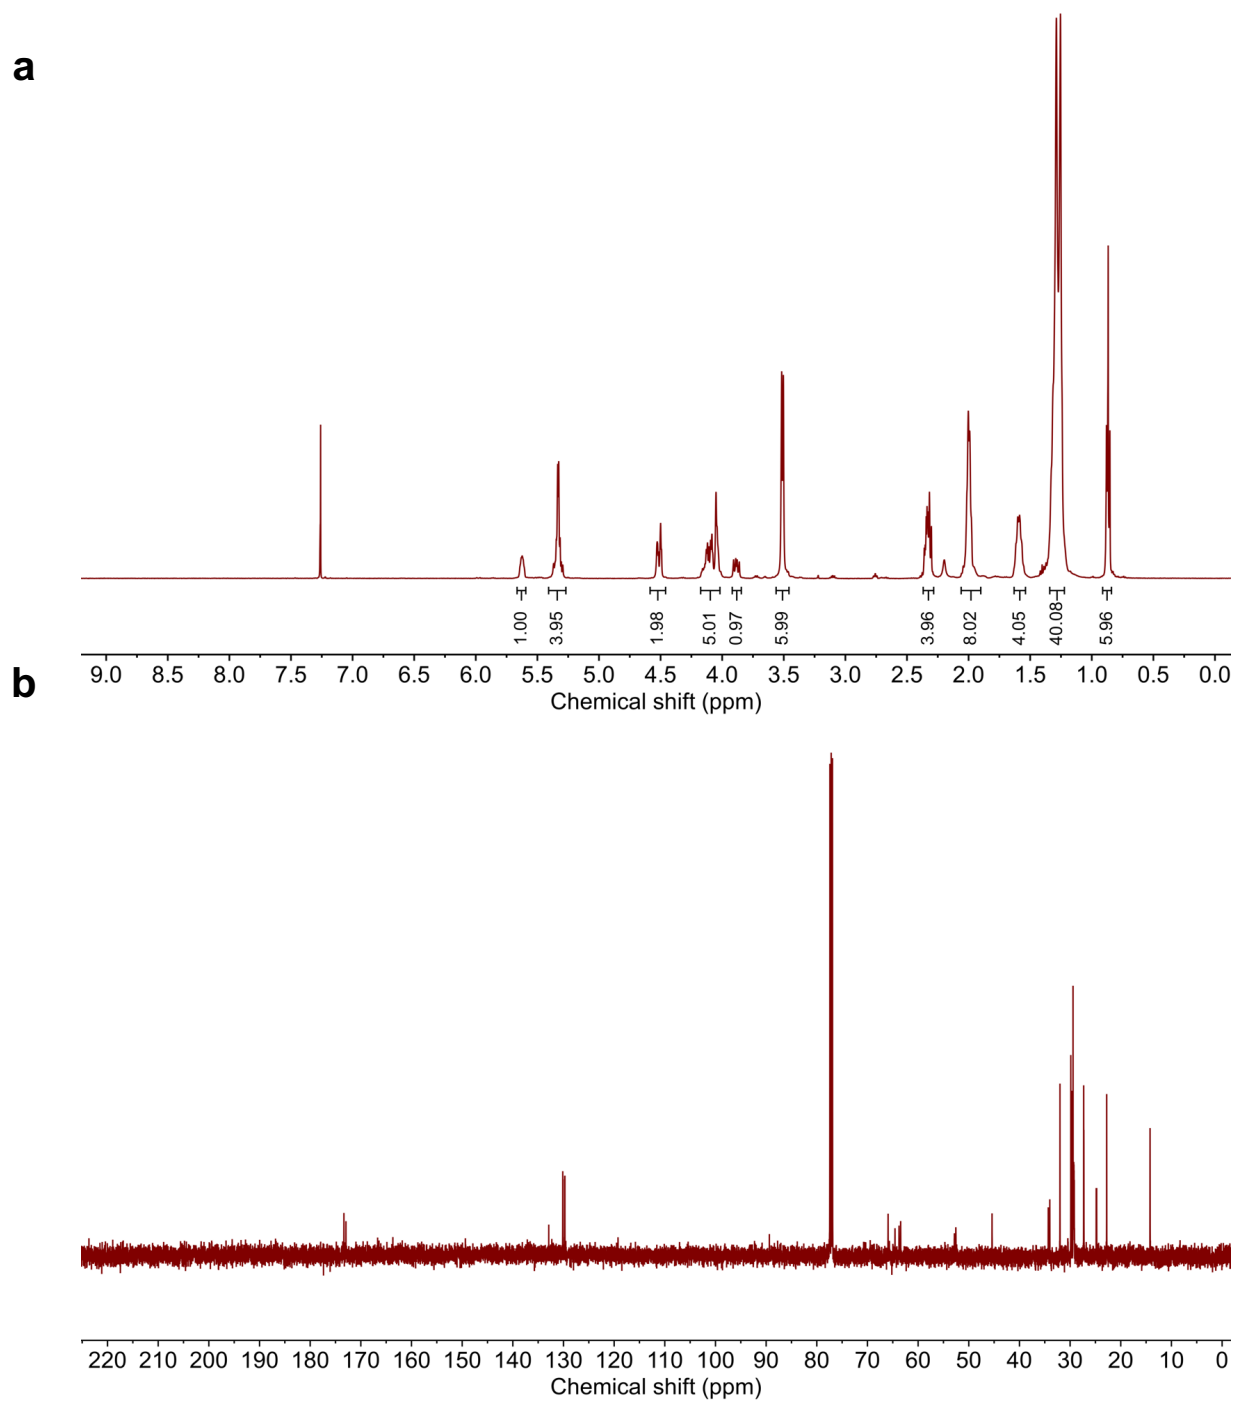

**Figure S3.** (a)  $^1\text{H}$  NMR spectrum and (b)  $^{13}\text{C}$  NMR spectrum of azido-DOTAP in  $\text{CDCl}_3$ .

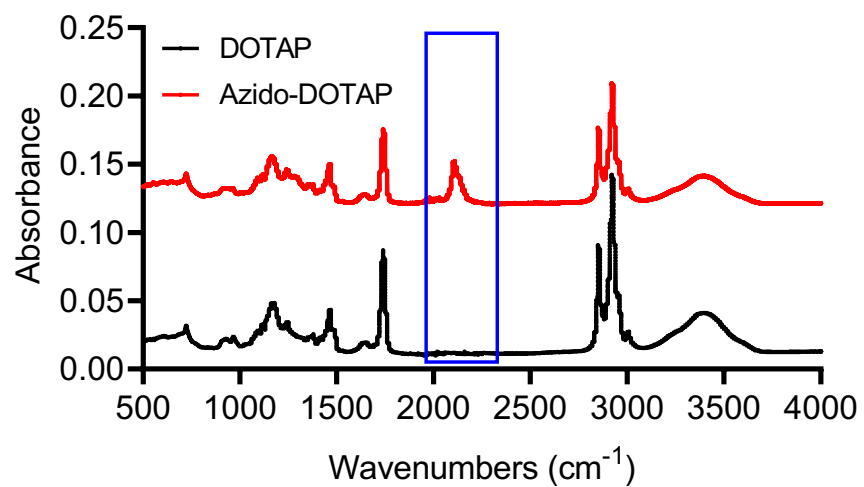

**Figure S4.** FTIR spectra of DOTAP and azido-DOTAP. The peak at 2106  $\text{cm}^{-1}$  indicates the presence of azido groups.

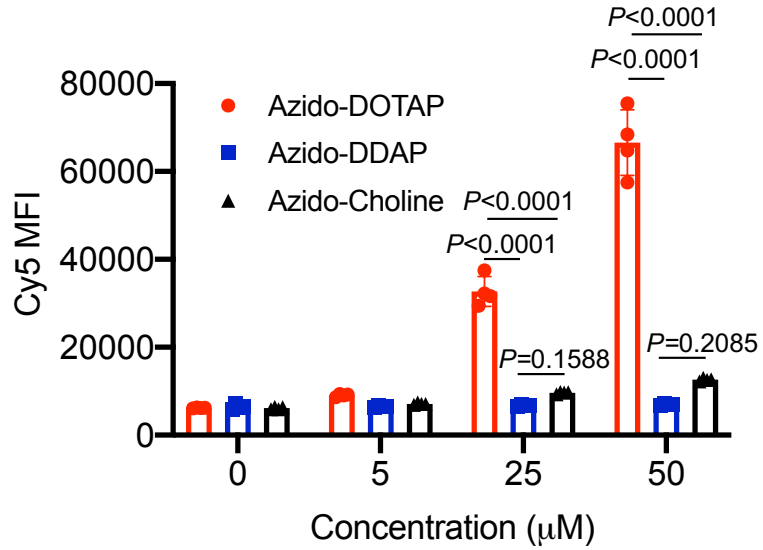

**Figure S5.** Cy5 fluorescence intensity of 4T1 cells after 24-h treatment with azido-DOTAP, azido-DDAP, or azido-choline (0, 25, and 50 μM, respectively) and 20-min staining with DBCO-Cy5. All the numerical data are presented as mean ± SD (0.01 < \**P* ≤ 0.05; \*\**P* ≤ 0.01; \*\*\**P* ≤ 0.001).

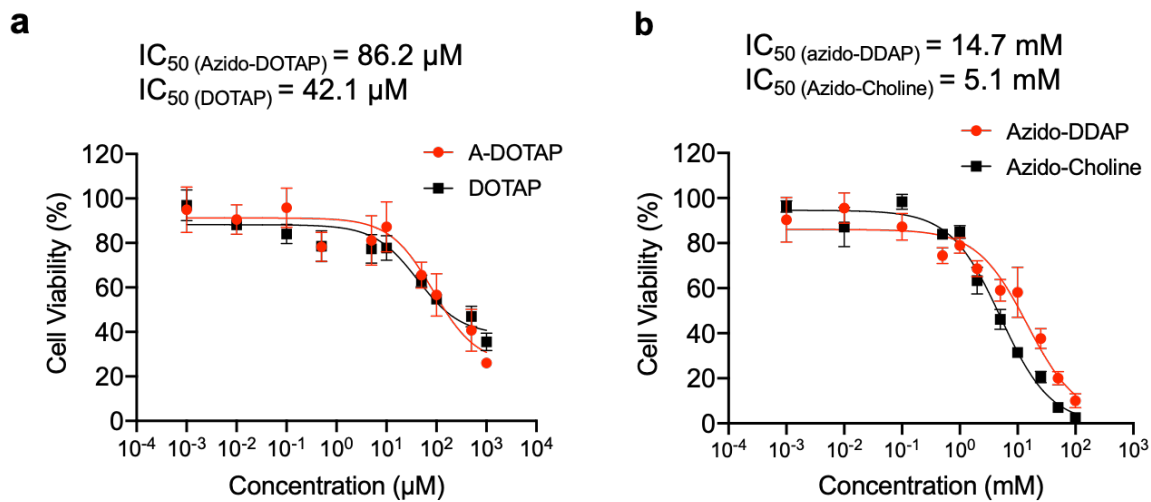

**Figure S6.** Viability of 4T1 cells after treatment with different concentrations of (a) azido-DOTAP, DOTAP, (b) azido-DDAP, or azido-Choline for 72 h, as measured via an MTT assay.

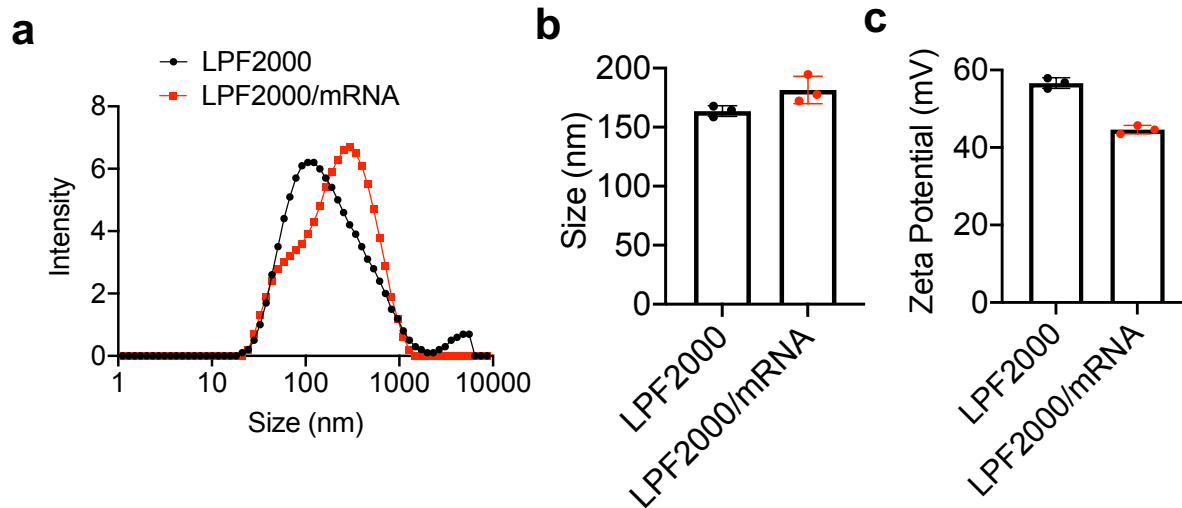

**Figure S7.** (a) Representative dynamic light scattering (DLS) profile of LPF2000 nanoparticles and LPF2000/mRNA complexes. (b) Average size of LPF2000 nanoparticles and LPF2000/mRNA complexes. (c) Zeta potential of LPF2000 nanoparticles and LPF2000/mRNA complexes. The mass ratio of LPF2000 and mRNA was fixed at 5:1.



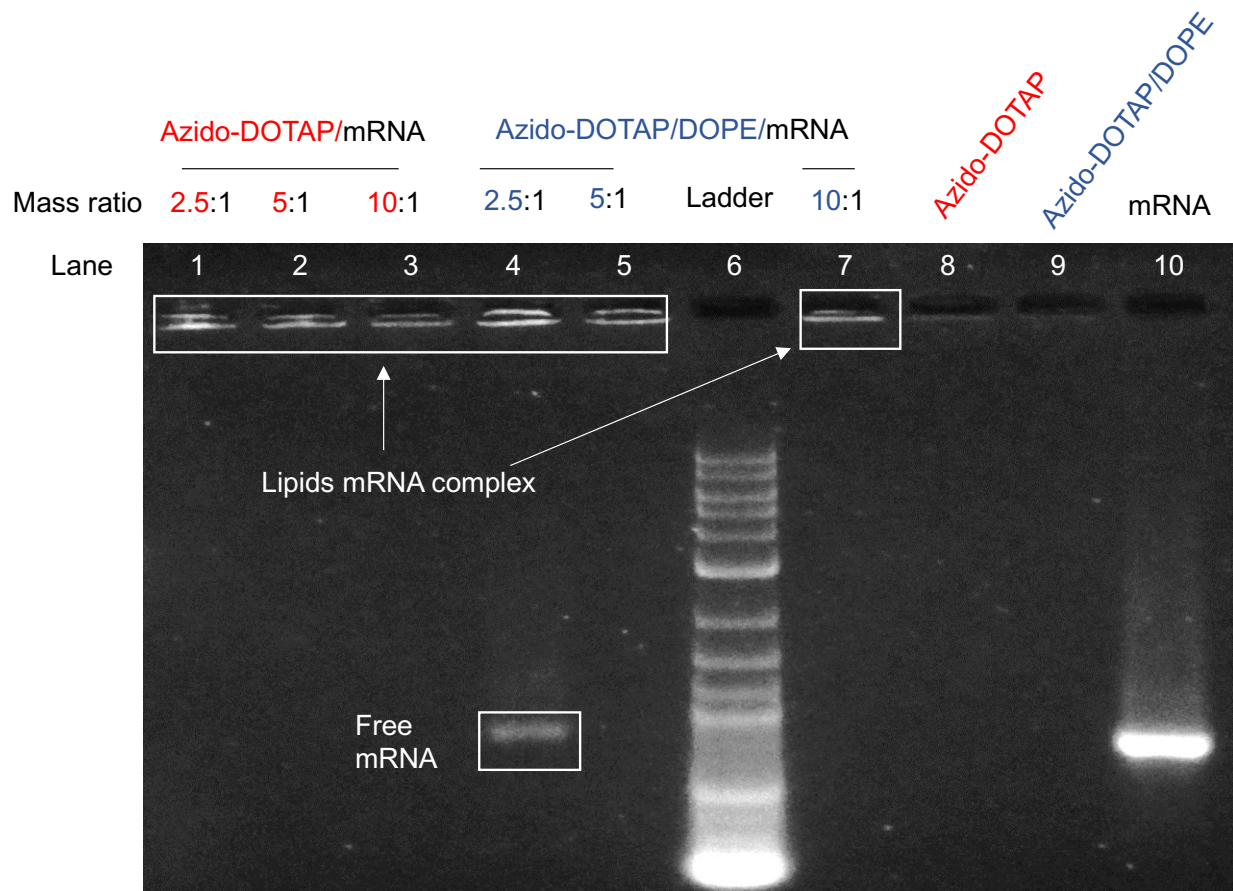

**Figure S8.** Agarose gel electrophoresis of azido-DOTAP/mRNA and azido-DOTAP/DOPE/mRNA complexes. Different mass ratios of lipids and eGFP mRNA were mixed in the Opti-MEM medium and incubated for 30 minutes prior to gel running. For azido-DOTAP/DOPE/mRNA complexes, the molar ratio of azido-DOTAP and DOPE was set at 6:4. Free mRNA, azido-DOTAP, and azido-DOTAP/DOPE mixture were used as controls. The amount of mRNA was fixed at 100 ng per lane. Note that 10:1 mass ratio equals to 4.5 N/P ratio.

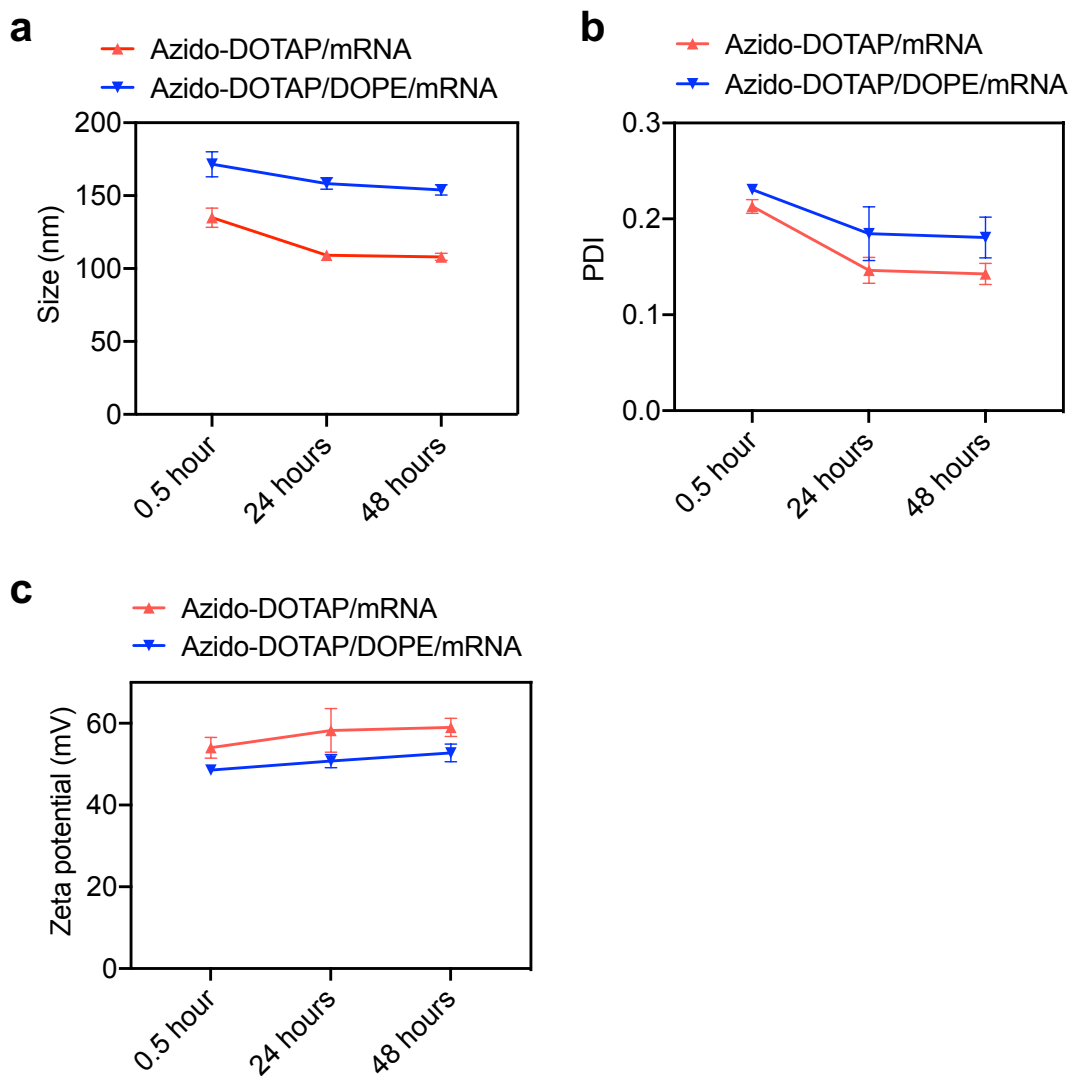

**Figure S9.** (a) Average size, (b) PDI, and (c) zeta potential of azido-DOTAP/mRNA and azido-DOTAP/DOPE/mRNA complexes after incubation at 37°C for 0.5, 24, and 48 hours, respectively. The mass ratio of LPF2000 and mRNA was fixed at 5:1. For azido-DOTAP/DOPE/mRNA complexes, the molar ratio of azido-DOTAP and DOPE was set at 6:4.

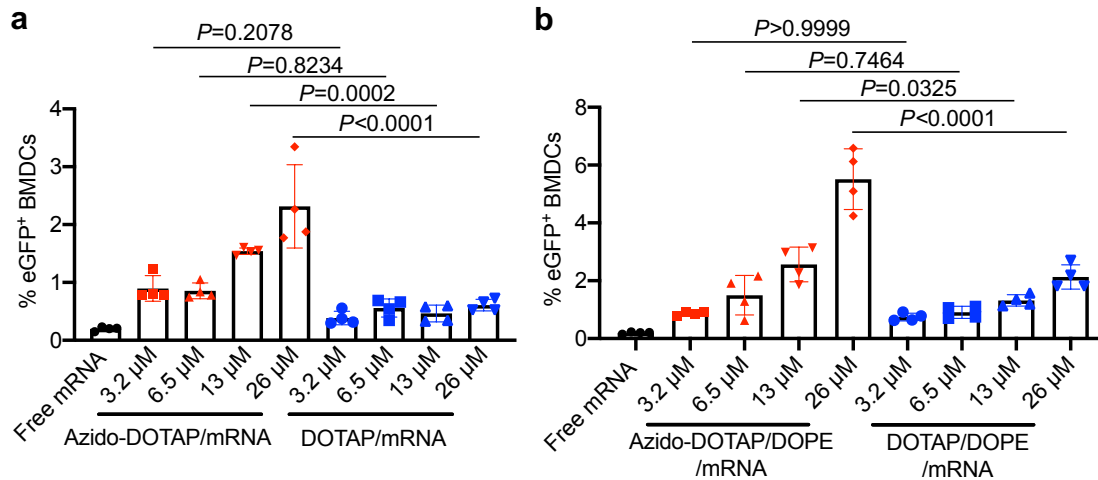

**Figure S10.** (a) % eGFP<sup>+</sup> BMDCs after 48-h treatment with free mRNA, azido-DOTAP/mRNA, or DOTAP/mRNA. (b) % eGFP<sup>+</sup> BMDCs after 48-h treatment with free mRNA, azido-DOTAP/DOPE/mRNA, or DOTAP/DOPE/mRNA. The concentration of mRNA was fixed at 1 μg/mL, while the concentration of azido-DOTAP or DOTAP was 3.2, 6.5, 13, and 26 μM, respectively. The molar ratio of azido-DOTAP (or DOTAP) to DOPE was 9:1. All the numerical data are presented as mean ± SD (0.01 < \**P* ≤ 0.05; \*\**P* ≤ 0.01; \*\*\**P* ≤ 0.001).

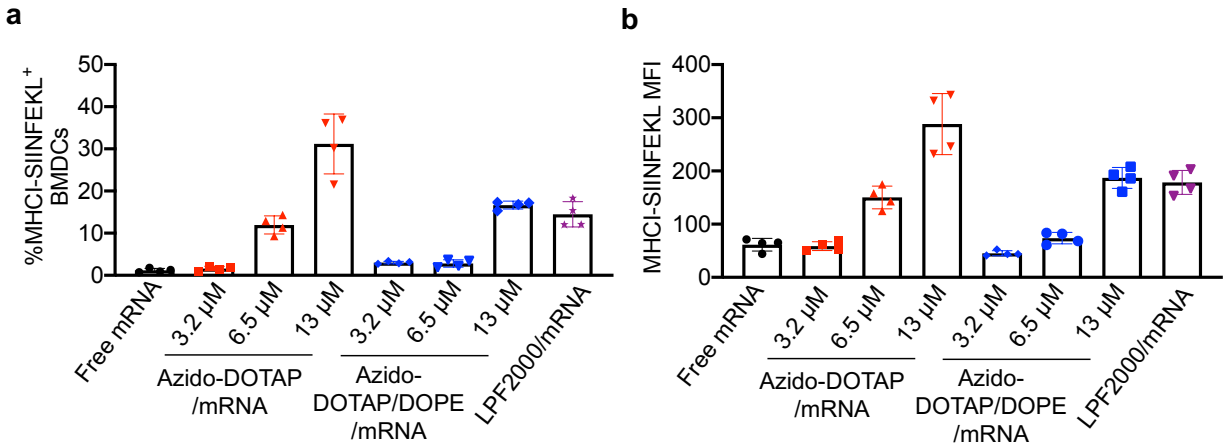

**Figure S11.** (a) Percentages of MHCII-SIINFEKL<sup>+</sup> BMDCs and (b) mean fluorescence intensity of BMDCs after incubating BMDCs with free mRNA, azido-DOTAP/mRNA, azido-DOTAP/DOPE/mRNA, or LPF2000/mRNA for 24 h. Cells were stained with APC-conjugated anti-MHCII-SIINFEKL, prior to flow cytometry analysis. All the numerical data are presented as mean  $\pm$  SD ( $0.01 < *P \leq 0.05$ ;  $**P \leq 0.01$ ;  $***P \leq 0.001$ ).

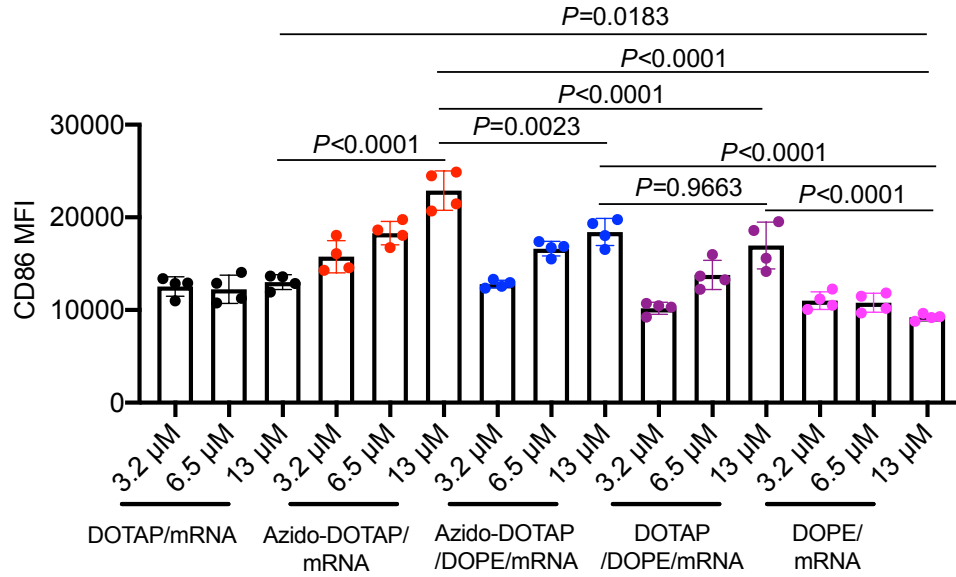

**Figure S12.** Mean CD86 fluorescence intensity of BMDCs after 48-h treatment with different groups and staining with PE/Cy7-conjugated anti-CD86. The concentration of SIINFEKL mRNA was fixed at 1 μg/mL, while the concentration of azido-DOTAP or DOTAP was 3.2, 6.5, 13, and 26 μM, respectively. The molar ratio of azido-DOTAP (or DOTAP) to DOPE was 9:1. All the numerical data are presented as mean ± SD (0.01 < \* $P$  ≤ 0.05; \*\* $P$  ≤ 0.01; \*\*\* $P$  ≤ 0.001).
